# Supplementary material for: Chronic sleep deprivation is associated with delayed puberty onset in rats, activation of proinflammatory cytokines and gut dysbiosis
Source: PeerJ. 2025 Jul 9;13:e19668. doi: 10.7717/peerj.19668 (PMC12255245; doi:10.7717/peerj.19668)
Supplement: Supplemental Information 6 [file peerj-13-19668-s006.xlsx]

## Sheet: Figure 1A
	Female
	Week	CF							Week	SDF
	0	44.8	47	42.6	47.2	46.8	45.6		0	39.4	44.6	43.6	39.8	42	39
	1	78.6	78.4	72.6	78.2	82.4	83.8		1	66.8	70.6	75.6	67.6	74	68
	2	108.2	103.2	105.8	103.2	113.8	116.2		2	96.6	110	103	96.8	103.8	96.2
	3	150.6	140	140.4	134.2	143.2	144.2		3	120.8	141.6	133.4	120.6	129.4	126.2
	4	182.8	167.8	169.6	157.8	165.2	168.2		4	147	166.8	157.6	139.4	151.4	149.2
	Male
	Week	CM							Week	SDM
	0	43.8	47.4	46.4	39.6	46.2	48.2		0	49.6	51.8	51.8	51.4	52.3	52.2
	1	83	87.6	86.8	73.6	84.6	86.8		1	85.4	83.6	91	82.6	89.4	83.8
	2	126	127.8	131.2	108.6	131	127.8		2	126.6	124.8	129.8	121.8	125.2	122.8
	3	185.8	186.8	190.2	160.8	190.4	187.4		3	154.8	163.8	155.2	165.2	154.8	151.6
	4	217.6	216.2	222.2	198	228.8	230.8		4	195	204.2	193	207.2	192.6	191.8

## Sheet: Figure 1B
		Female				Male
		Vaginal opening (day)				Preputial separation (day)
		CF	SDF			CM	SDM
		30	35			44	43
		35	34			40	45
		29	34			40	45
		30	40			40	45
		32	40			39	48
		30	35			39	45
