# Supplementary material for: Chronic sleep deprivation is associated with delayed puberty onset in rats, activation of proinflammatory cytokines and gut dysbiosis
Source: PeerJ. 2025 Jul 9;13:e19668. doi: 10.7717/peerj.19668 (PMC12255245; doi:10.7717/peerj.19668)
Supplement: Supplemental Information 7 [file peerj-13-19668-s007.xlsx]

## Sheet: Figure 2A
			Female rat
			CAT activity			SOD			GPx activity
			CF	SDF		CF	SDF		CF	SDF
			2.36934	5.7216		8.90778	27.4533		214.866	124.708
			6.39037	3.40922		18.5617	10.2867		106.198	162.258
			2.23931	2.68719		13.1356	12.6398		125.968	148.313
			1.81742	2.96425		19.8888	14.8408		130.638	179.429
			2.18972	5.32777		13.9483	34.1531		216.687	197.849
			3.95167	3.85858		18.6997	12.441		138.295	99.3682
			Male rat
			CAT activity			SOD			GPx activity
			CM	SDM		CM	SDM		CM	SDM
			65.6446	69.5636		10.8902	18.3807		124.405	130.745
			74.2863	156.548		15.9388	16.2556		115.239	129.506
			65.1189	81.3944		10.6304	17.1011		112.041	181.125
			67.5514	107.708		11.8793	32.8835		100.583	147.619
			54.8093	136.998		9.83105	21.5747		131.278	182.26
			53.6616	62.6009		11.0336	27.4352		130.44	178.082

## Sheet: Figure 2B
			Female rat
			CAT activity			SOD			GPx activity
			CF	SDF		CF	SDF		CF	SDF
			42.1587	53.6942		0.95312	1.20719		680.754	683.192
			47.3792	45.3637		1.16143	1.14339		423.858	886.516
			47.2818	50.2737		0.895638	1.112		599.375	714.13
			36.857	47.5367		0.969823	1.16916		792.403	639.649
			39.3924	50.7452		0.905019	1.04559		745.641	656.856
			42.7404	56.353		1	1.4165		658.458	859.765
			Male rat
			CAT activity			SOD			GPx activity
			CM	SDM		CM	SDM		CM	SDM
			8.85464	12.3815		0.789766	0.986346		109.529	125.238
			8.02049	15.3513		0.690324	0.854389		97.8554	102.2
			9.74005	12.8216		0.667889	0.970024		109.236	113.413
			7.9701	11.4161		0.687173	0.871911		106.263	106.866
			6.38724	16.3463		0.787137	0.976817		101.554	125.631
			7.29907	14.1983		0.756988	0.863759		104.118	113.25
