# Supplementary material for: Chronic sleep deprivation is associated with delayed puberty onset in rats, activation of proinflammatory cytokines and gut dysbiosis
Source: PeerJ. 2025 Jul 9;13:e19668. doi: 10.7717/peerj.19668 (PMC12255245; doi:10.7717/peerj.19668)
Supplement: Supplemental Information 8 [file peerj-13-19668-s008.xlsx]

## Sheet: Figure 3A
LBP (pg/ml)			LBP (pg/ml)							IL1β (pg/ml)			IL1β (pg/ml)							IL6 (pg/ml)			IL6 (pg/ml)									TNF-α (pg/ml)			TNF-α (pg/ml)
SF	SDF		SF	SDF						SF	SDF		SF	SDF						SF	SDF		SF	SDF								SF	SDF		SF	SDF
1379.13	2230.11		2304.92	2480.75						0	0.24		0.885	0						0	10.065		2.18	12.445								1.04	0.73		1.505	1.6
3109.2	2919.91		1405.68	2265.2						0.155	0		0.085	0						9.345	13.43		3.485	6.135								0.57	0.97		1.305	1.18
1594.83	2381.49		2032.94	2103.72						0	0		0.32	0.155						1.84	23.2		7.94	18.535								0.4	0.88		1.06	0.91
1734.62	2088.41		2074.66	2352.74						0	0.08		0.04	0.095						3.08	6.16		6.185	25.03								0.38	1.39		0.95	1.43
1684.07	3024.36		2228.94	2215.28						0	0.23		0	1.435						0	3.865		3.87	8.185								0.1	1.41		1.74	4.31
1516.62	2502.44		2293.63	2524.5						0	0.24		0	0.605						0	7.135		4.89	9.605								0.7	0.96		1.23	0.73
Information of LBP ELISA kit										Information of multi-analyte flow assay kit										Information of multi-analyte flow assay kit											Information of multi-analyte flow assay kit
Product: Rat Lipolysaccharide Binding Protein (LBP) ELISA Kit										LEGENDplex™ Multi-Analyte Flow Assay Kit (BioLegend; Cat. 741395 and 741396)										LEGENDplex™ Multi-Analyte Flow Assay Kit (BioLegend; Cat. 741395 and 741396)											LEGENDplex™ Multi-Analyte Flow Assay Kit (BioLegend; Cat. 741395 and 741396)
Detection range: 4000~62.5 pg/ml										LOD: 1.24 (pg/ml)										LOD: 30.76 (pg/ml)											LOD: 1.80 (pg/ml)
Specicifity: This assay has high sensitivity and excellent specificity for detection of rat LBP										IC50: 183.66 (pg/ml)										IC50: 242.85 (pg/ml)											IC50: 50.37 (pg/ml)

## Sheet: Figure 3B
	Female group																					Male group
	IL-1β						IL-6						TNF-α									IL-1β						IL-6						TNF-α
	Group	Cp value			Average Cp		Group	Cp value			Average Cp		Group	Cp value			Average Cp					Group	Cp value			Average Cp		Group	Cp value			Average Cp		Group	Cp value			Average Cp
	CF2	26.8311	27.3412	27.3816	27.1846		CF1	29.5459	29.5066	29.3877	29.48		CF1	35.5113	35.4684	33.1376	34.7058					CM3	27.687	27.9439	27.9857	27.8722		CM1	29.6391	29.8213	29.9013	29.7872		CM2	32.9495	33.1128	32.6417	32.9013
	CF3	26.5363	26.9433	27.4992	26.9929		CF2	29.6681	29.4469	29.4241	29.5131		CF2	32.4343	32.0559	35.0937	33.1946					CM4	29.0267	29.1028	29.0809	29.0701		CM2	29.8755	30.0484	29.9807	29.9682		CM3	32.6009	32.4129	32.4837	32.4992
	CF4	26.1084	26.6493	27.3929	26.7169		CF3	29.2018	27.9903	28.7357	28.6426		CF3	32.7298	33.2115	31.778	32.9706					CM5	28.7958	28.9308	28.8088	28.8451		CM3	29.9853	29.9185	29.8033	29.9024		CM4	32.3985	33.1219	33.9796	33.1667
	CF5	27.9933	28.3479	28.4389	28.26		CF4	29.4225	28.6043	28.4519	28.8262		CF4	32.9124	33.869	33.2818	33.3544					CM6	29.3604	29.4758	29.7249	29.5204		CM4	30.0255	29.8922	30.1394	30.019		CM5	32.1444	32.5562	33.2981	32.6663
	CF6	24.5219	25.1761	25.4412	25.0464		CF5	29.0845	28.5141	28.8996	28.8327		CF6	32.391	32.5872	32.1202	32.3661					CM7	29.0428	29.1283	29.4706	29.2139		CM5	29.7736	29.9799	29.9121	29.8885		CM6	32.1283	32.7626	32.1559	32.3489
	CF8	25.6855	26.3985	26.3605	26.1482		CF7	29.4559	28.6331	28.8451	28.978		CF7	32.9956	33.1541	32.3246	32.8248					CM8	28.8885	29.019	29.0838	28.9971		CM6	29.8968	29.4151	29.8833	29.7317		CM8	32.138			32.138
	SDF1	28.5985	28.9275	29.1756	28.9005		SDF1	29.4451	29.4455	29.5337	29.4748		SDF2	32.1797		31.8146	31.9971					SDM1	27.7343	27.8855	28.2574	27.9591		SDM1	29.9217	29.8882	29.888	29.8993		SDM2	32.9205	33.2288	32.5426	32.8973
	SDF2	26.863	27.4238	27.5747	27.2872		SDF2	28.6256	29.2486	29.5538	29.1426		SDF3		32.4026	32.3668	32.3847					SDM2	27.8723	27.9814	28.2807	28.0448		SDM2	29.9814	30.0965	30.0259	30.0346		SDM3	33.3682	33.3927	33.4029	33.388
	SDF3	26.0798	27.5178	27.6426	27.08		SDF3	28.6849	29.2142	28.9801	28.9597		SDF4	32.8933	32.5678	32.7643	32.7418					SDM3	28.6911	29.3742	29.2971	29.1208		SDM3	29.8622	29.8702	29.9595	29.8973		SDM4		33.2708	31.9205	32.5956
	SDF6	26.3144	26.8005	26.7831	26.6327		SDF4	28.3714	28.6333	29.0394	28.6814		SDF5	32.4875	33.0501	32.2179	32.5852					SDM4	27.7343	28.0828	28.3633	28.0601		SDM5	29.7319	29.9577	29.9511	29.8802		SDM5	32.1366	32.3364	32.7838	32.4189
	SDF7	26.7652	27.4581	27.1779	27.1338		SDF5	28.4608	29.2419	28.8842	28.8623		SDF7	32.1181	32.2987		32.2084					SDM5	28.6625	28.6806	28.7159	28.6863		SDM6	29.8058	29.9851	29.1897	29.6602		SDM7		31.9795	32.6533	32.3164
	SDF8	27.9187	28.3198	28.5314	28.2566		SDF6	28.969	28.9186	29.0403	28.976		SDF8	32.3734	32.2562	32.2942	32.3079					SDM6	28.273	28.2697	28.5275	28.3567		SDM7	29.952	30.0032	30.0084	29.9879		SDM8	33.7572	31.8292	33.21	32.9322
	GAPDH						GAPDH						GAPDH									GAPDH						GAPDH						GAPDH
	Group	Cp value			Average Cp		Group	Cp value			Average Cp		Group	Cp value			Average Cp					Group	Cp value			Average Cp		Group	Cp value			Average Cp		Group	Cp value			Average Cp
	CF2	25.4987	25.7083	25.8091	25.672		CF1	26.255	26.6684	26.5347	26.486		CF1	26.255	26.6684	26.5347	26.486					CM3	24.5354	24.8844	24.9893	24.803		CM1	24.5697	24.6119	24.7351	24.6389		CM2	25.4665	25.9636	26.0254	25.8185
	CF3	25.2503	25.4513	25.56	25.4205		CF2	25.4987	25.7083	25.8091	25.672		CF2	25.4987	25.7083	25.8091	25.672					CM4	25.8209	25.9444	26.1586	25.9746		CM2	25.4665	25.9636	26.0254	25.8185		CM3	24.5354	24.8844	24.9893	24.803
	CF4	25.2853	25.3615	25.5116	25.3861		CF3	25.2503	25.4513	25.56	25.4205		CF3	25.2503	25.4513	25.56	25.4205					CM5	24.832	24.4652	24.1468	24.4813		CM3	24.5354	24.8844	24.9893	24.803		CM4	25.8209	25.9444	26.1586	25.9746
	CF5	26.0752	26.4857	26.5873	26.3827		CF4	25.2853	25.3615	25.5116	25.3861		CF4	25.2853	25.3615	25.5116	25.3861					CM6	25.3148	25.8226	25.9974	25.7116		CM4	25.8209	25.9444	26.1586	25.9746		CM5	24.832	24.4652	24.1468	24.4813
	CF6	24.3522	24.5988	24.7227	24.5579		CF5	26.0752	26.4857	26.5873	26.3827		CF6	24.3522	24.5988	24.7227	24.5579					CM7	24.5707	24.8473	25.0082	24.8087		CM5	24.832	24.4652	24.1468	24.4813		CM6	25.3148	25.8226	25.9974	25.7116
	CF8	24.5463	24.889	24.8935	24.7763		CF7	23.9247	24.3006	24.3294	24.1849		CF7	23.9247	24.3006	24.3294	24.1849					CM8	24.726	25.063	25.5331	25.1074		CM6	25.3148	25.8226	25.9974	25.7116		CM8	24.726	25.063	25.5331	25.1074
	SDF1	25.6952	25.9505	25.872	25.8392		SDF1	25.6952	25.9505	25.872	25.8392		SDF2	25.451	25.5313	25.4827	25.4883					SDM1	26.0084	26.0827	26.1858	26.0923		SDM1	26.0084	26.0827	26.1858	26.0923		SDM2	25.6123	25.8496	25.943	25.8016
	SDF2	25.451	25.5313	25.4827	25.4883		SDF2	25.451	25.5313	25.4827	25.4883		SDF3	25.9697	26.0331	25.9631	25.9886					SDM2	25.6123	25.8496	25.943	25.8016		SDM2	25.6123	25.8496	25.943	25.8016		SDM3	26.0113	26.1163	26.3052	26.1443
	SDF3	25.9697	26.0331	25.9631	25.9886		SDF3	25.9697	26.0331	25.9631	25.9886		SDF4	26.3937	26.5476	26.4824	26.4746					SDM3	26.0113	26.1163	26.3052	26.1443		SDM3	26.0113	26.1163	26.3052	26.1443		SDM4	25.1455	25.2508	25.4211	25.2724
	SDF6	25.9438	25.9962	26.0055	25.9818		SDF4	26.3937	26.5476	26.4824	26.4746		SDF5	25.1809	26.1326	26.061	25.7915					SDM4	25.1455	25.2508	25.4211	25.2724		SDM5	24.761	24.7867	24.9656	24.8378		SDM5	24.761	24.7867	24.9656	24.8378
	SDF7	26.4215	26.323	26.5933	26.4459		SDF5	25.1809	26.1326	26.061	25.7915		SDF7	26.4215	26.323	26.5933	26.4459					SDM5	24.761	24.7867	24.9656	24.8378		SDM6	25.7423	25.8099	26.0722	25.8748		SDM7	25.3351	25.4665	25.5417	25.4477
	SDF8	25.4369	25.5686	25.6447	25.5501		SDF6	25.9438	25.9962	26.0055	25.9818		SDF8	25.4369	25.5686	25.6447	25.5501					SDM6	25.7423	25.8099	26.0722	25.8748		SDM7	25.3351	25.4665	25.5417	25.4477		SDM8	24.6707	24.7709	24.9109	24.7842

## Sheet: Figure 3C
	Female group																					Male group
	IL-1β						IL-6						TNF-α									IL-1β						IL-6						TNF-α
	Group	Cp value			Average Cp		Group	Cp value			Average Cp		Group	Cp value			Average Cp					Group	Cp value			Average Cp		Group	Cp value			Average Cp		Group	Cp value			Average Cp
	CF2	26.423	26.7374	26.8614	26.6739		CF2	27.9542	28.0179	28.2363	28.0695		CF2	29.2862	29.711	30.1867	29.728					CM2	28.8338	28.7293	28.5029	28.6887		CM1	29.2355	29.5735	29.6458	29.4849		CM2	29.4824	29.6035	29.947	29.6776
	CF3	26.8082	27.1661	27.0813	27.0185		CF3	28.2636	28.7182	28.8236	28.6018		CF3	29.1338	29.6756	30.1942	29.6679					CM3	28.0818	28.6827	28.963	28.5759		CM2	29.2381	29.8537	29.378	29.4899		CM3	29.535	30.1151	29.8171	29.8224
	CF4	27.7214	28.2061	28.1896	28.039		CF4	28.1098	28.4638	28.2622	28.2786		CF4	30.7772	31.9056	30.8462	31.1764					CM4	28.4995	28.409	28.6128	28.5071		CM3	29.3499	29.7781	29.448	29.5253		CM4	29.7335	29.8911	29.6749	29.7665
	CF5	28.143	28.1008	27.3943	27.8793		CF5	28.3936	28.9246	28.7349	28.6844		CF5	30.3901	30.3703	31.0948	30.6184					CM5	27.5739	27.6478	28.1406	27.7874		CM4	29.4284	29.4741	29.2329	29.3785		CM5	29.2858	29.5261	29.7104	29.5074
	CF6	27.2113	27.3622	27.5325	27.3687		CF6	28.4315	28.7647	28.6492	28.6151		CF6	30.0512	30.1057	30.2377	30.1315					CM6	28.2038	28.8922	28.697	28.5977		CM5	28.7942	29.2891	29.4512	29.1782		CM6	29.939	29.5082	30.058	29.8351
	CF7	27.7497	27.5989	26.9311	27.4266		CF7	28.7843	28.7786	28.7698	28.7775		CF7	30.6731	30.5376	31.252	30.8209					CM7	28.0091	28.3508	28.2434	28.2011		CM6	29.5522	29.7639	29.7281	29.6814		CM7	30.111	29.8987	29.9493	29.9863
	SDF1	27.957	28.2038	27.7753	27.9787		SDF1	29.2018	28.958	29.3645	29.1748		SDF1	31.3946	30.9132	30.9932	31.1003					SDM2	27.9534	28.4766	28.271	28.2337		SDM2	29.5329	29.2886	29.2604	29.3606		SDM1	29.2462	29.0224	29.1329	29.1338
	SDF2	25.779	26.2296	26.0286	26.0124		SDF2	26.8424	27.1649	26.9879	26.9984		SDF2	30.098	29.2206	29.7053	29.6746					SDM3	28.0368	28.3374	28.4457	28.2733		SDM3	29.2387	29.5618	29.3167	29.3724		SDM3	29.2779	29.4015	29.8042	29.4945
	SDF3	25.1946	25.4931	25.6298	25.4392		SDF4	28.0529	27.8766	28.1515	28.027		SDF3	29.4423	29.2733	29.5059	29.4071					SDM4	28.7079	28.5741	28.4385	28.5735		SDM4	29.3775	29.7861	29.6442	29.6026		SDM5	29.7358	29.8225	29.8395	29.7993
	SDF4	26.4083	26.9249	26.9599	26.7644		SDF5	28.2884	28.556	28.7393	28.5279		SDF5	30.1784	30.834	30.5138	30.5087					SDM5	28.6415	28.9785	27.4962	28.3721		SDM5	29.4431	29.5658	29.3986	29.4692		SDM6	29.7131	30.1968	30.334	30.0813
	SDF5	26.978	27.358	27.3124	27.2161		SDF7	28.4698	28.6413	28.5638	28.5583		SDF6	29.8618	29.5593	30.0594	29.8268					SDM6	28.313	28.5577	28.8653	28.5787		SDM6	29.4367	29.4304	29.8546	29.5739		SDM7	29.8472	29.5273	30.2786	29.8844
	SDF6	26.3139	26.6443	26.5926	26.517		SDF8	27.1874	27.1907	27.1893	27.1892		SDF7	29.6024	29.8438	30.194	29.8801					SDM7	27.9966	28.4921	28.1489	28.2125		SDM7	29.2056	29.3467	29.7481	29.4335		SDM8	29.4104	29.082	28.6077	29.0333
	GAPDH						GAPDH						GAPDH									GAPDH						GAPDH						GAPDH
	Group	Cp value			Average Cp		Group	Cp value			Average Cp		Group	Cp value			Average Cp					Group	Cp value			Average Cp		Group	Cp value			Average Cp		Group	Cp value			Average Cp
	CF2	19.0526	19.3091	19.3859	19.2492		CF2	19.0526	19.3091	19.3859	19.2492		CF2	19.0526	19.3091	19.3859	19.2492					CM2	20.2378	20.3221	20.3925	20.3175		CM1	20.9922	20.765	20.9705	20.9093		CM2	20.2378	20.3221	20.3925	20.3175
	CF3	18.4981	18.6943	18.8055	18.666		CF3	18.4981	18.6943	18.8055	18.666		CF3	18.4981	18.6943	18.8055	18.666					CM3	20.3548	20.5073	20.6434	20.5018		CM2	20.2378	20.3221	20.3925	20.3175		CM3	20.3548	20.5073	20.6434	20.5018
	CF4	20.0982	20.3335	20.4284	20.2867		CF4	20.0982	20.3335	20.4284	20.2867		CF4	20.0982	20.3335	20.4284	20.2867					CM4	20.6473	20.8195	20.8887	20.7852		CM3	20.3548	20.5073	20.6434	20.5018		CM4	20.6473	20.8195	20.8887	20.7852
	CF5	19.9721	20.1141	20.2835	20.1232		CF5	19.9721	20.1141	20.2835	20.1232		CF5	19.9721	20.1141	20.2835	20.1232					CM5	20.1056	19.896	19.988	19.9965		CM4	20.6473	20.8195	20.8887	20.7852		CM5	20.1056	19.896	19.988	19.9965
	CF6	19.0412	19.0595	19.254	19.1182		CF6	19.0412	19.0595	19.254	19.1182		CF6	19.0412	19.0595	19.254	19.1182					CM6	20.6795	20.9363	20.9881	20.868		CM5	20.1056	19.896	19.988	19.9965		CM6	20.6795	20.9363	20.9881	20.868
	CF7	19.8741	20.0712	20.0783	20.0079		CF7	19.8741	20.0712	20.0783	20.0079		CF7	19.8741	20.0712	20.0783	20.0079					CM7	20.2831	20.6528	20.5741	20.5033		CM6	20.6795	20.9363	20.9881	20.868		CM7	20.2831	20.6528	20.5741	20.5033
	SDF1	20.8893	21.1595	21.1757	21.0748		SDF1	20.8893	21.1595	21.1757	21.0748		SDF1	20.8893	21.1595	21.1757	21.0748					SDM2	20.3581	20.4413	20.5808	20.46		SDM2	20.3581	20.4413	20.5808	20.46		SDM1	19.8869	20.0105	20.1304	20.0093
	SDF2	18.7988	18.9535	19.0232	18.9252		SDF2	18.7988	18.9535	19.0232	18.9252		SDF2	18.7988	18.9535	19.0232	18.9252					SDM3	20.2519	20.4243	20.554	20.4101		SDM3	20.2519	20.4243	20.554	20.4101		SDM3	20.2519	20.4243	20.554	20.4101
	SDF3	18.4428	18.9979	18.8562	18.7656		SDF4	18.7174	18.9983	18.971	18.8956		SDF3	18.4428	18.9979	18.8562	18.7656					SDM4	20.5179	20.6038	20.6557	20.5925		SDM4	20.5179	20.6038	20.6557	20.5925		SDM5	20.7208	20.9802	20.9246	20.8752
	SDF4	18.7174	18.9983	18.971	18.8956		SDF5	19.7964	19.9909	20.0626	19.95		SDF5	19.7964	19.9909	20.0626	19.95					SDM5	20.7208	20.9802	20.9246	20.8752		SDM5	20.7208	20.9802	20.9246	20.8752		SDM6	20.9386	21.18	21.1937	21.1041
	SDF5	19.7964	19.9909	20.0626	19.95		SDF7	19.0989	19.4073	19.2683	19.2582		SDF6	19.3877	19.2693	19.0712	19.2427					SDM6	20.9386	21.18	21.1937	21.1041		SDM6	20.9386	21.18	21.1937	21.1041		SDM7	20.756	20.8873	20.9383	20.8605
	SDF6	19.3877	19.2693	19.0712	19.2427		SDF8	18.7845	18.7652	18.7686	18.7728		SDF7	19.0989	19.4073	19.2683	19.2582					SDM7	20.756	20.8873	20.9383	20.8605		SDM7	20.756	20.8873	20.9383	20.8605		SDM8	20.2686	20.3928	20.6576	20.4397
